# Supplementary material
Source: PubMed Central journal article supplement (PMC4455129)
Supplement: ncomms8214-s1.pdf [file ncomms8214-s1.pdf]

## Supplementary Figure 1.

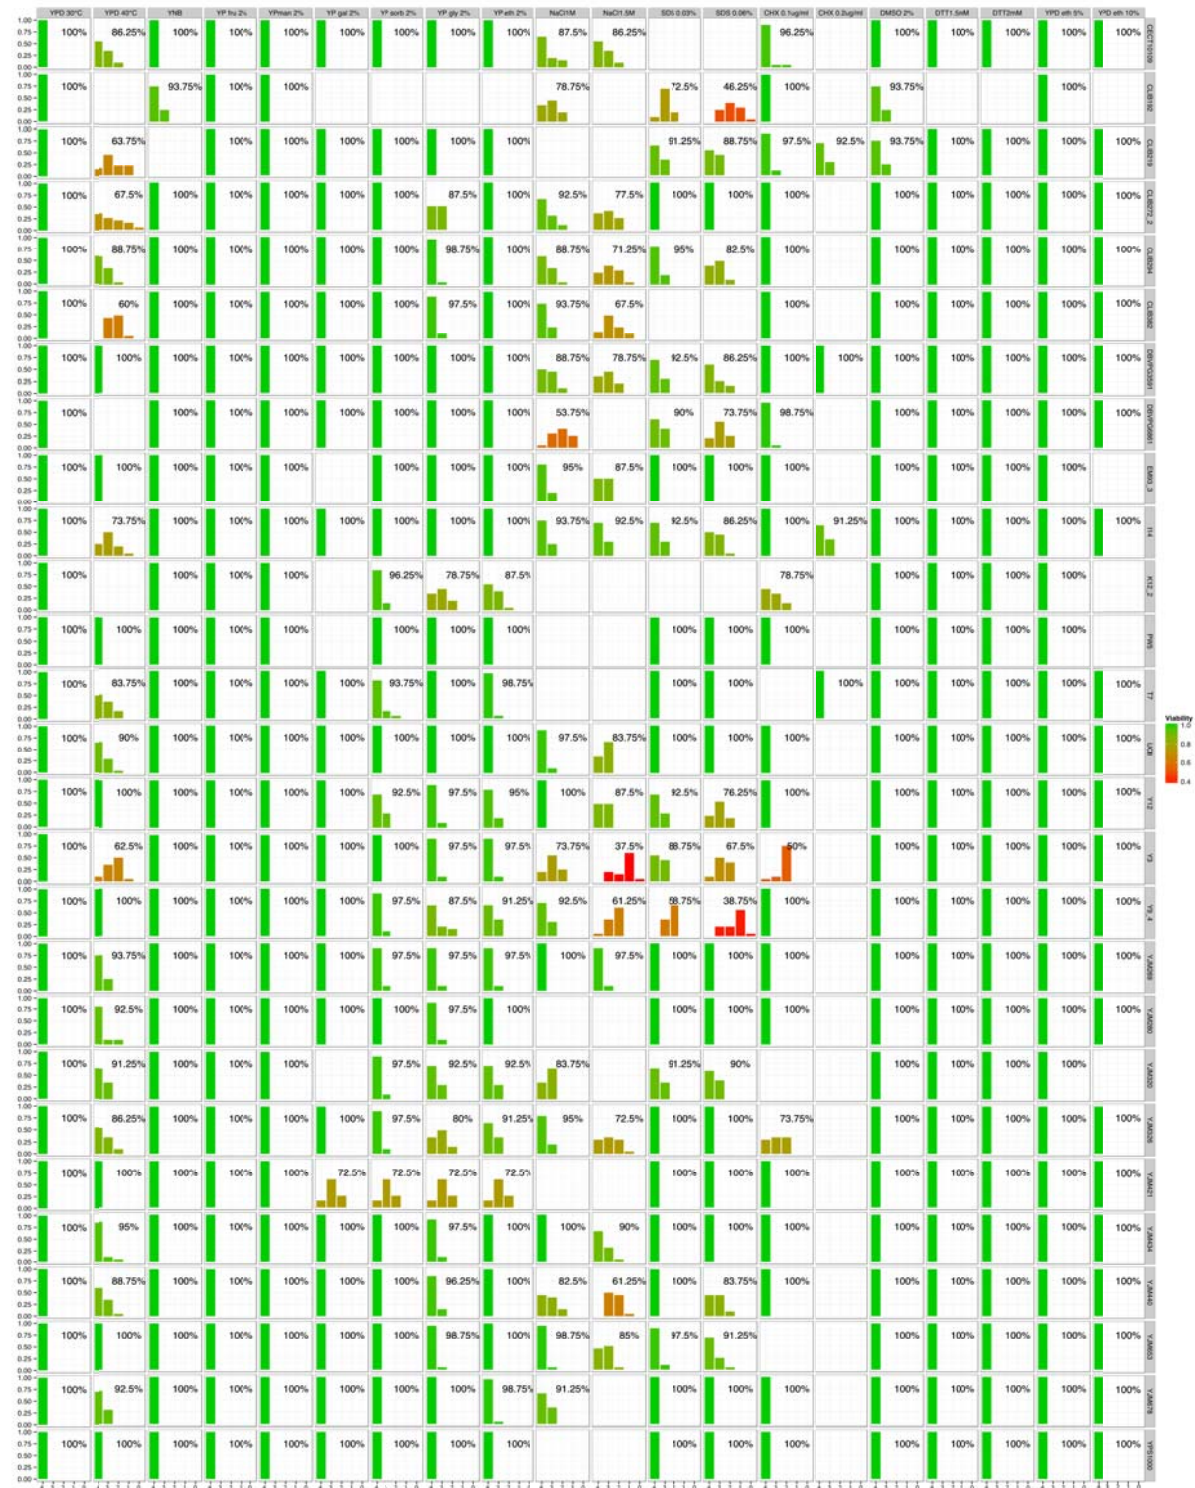

**Supplementary Figure 1, related to Figure 1 - Lethal phenotype segregation of 27 crosses on 20 conditions.** Segregation of 20 full tetrads (containing 4 viable spores on YPD) tested for each cross (vertical axis) and each condition (horizontal axis) are presented. The resulting offspring viabilities are colour coded.

## Supplementary Figure 2.

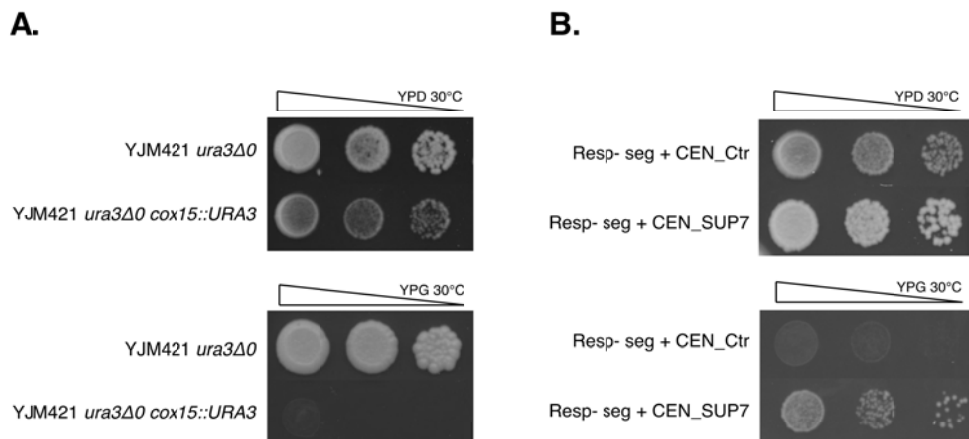

**Supplementary Figure 2, related to Figure 2 - Functional validation of the incompatible gene pair.** **A.** Deletion of *cox15<sup>stop</sup>* in the YJM421 background results in respiratory deficiency. Strains with or without deletion of *cox15<sup>stop</sup>* (YJM421 *ura3Δ0 cox15<sup>stop</sup>::URA3* and YJM421 *ura3Δ0*, respectively) in exponential growth phase were spotted in 3 dilutions onto YPD (upper plot) and YP glycerol 2% (lower plot). Cells were grown for 48 hours at 30°C. **B.** Rescue of respiration capacity in non-viable segregants on YP glycerol 2% with *SUP7*. Respiration deficient F1 segregant was transformed with plasmids containing *SUP7* or empty control and grown for 48 hours at 30°C on YPD (upper plot) and YP glycerol 2% (lower plot).

### Supplementary Figure 3.

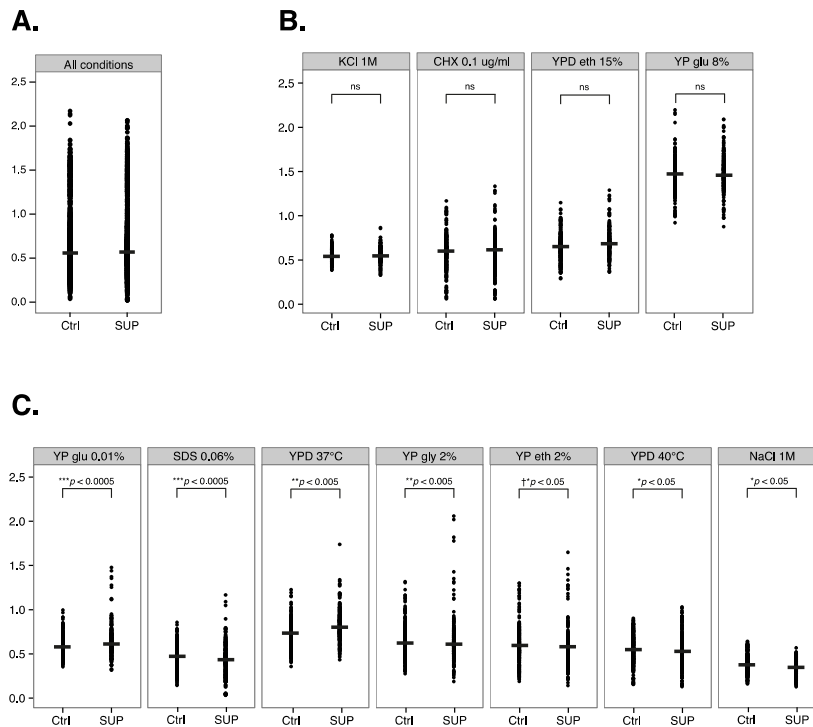

**Supplementary Figure 3, related to Figure 3 - Phenotypic distribution of normalized growth ratio across natural populations in stress conditions.** **A.** All conditions tested. Median values are indicated with a bar. Statistical tests were performed using F-test for cases with normal distribution and Levene test for multimodal distributions. **B.** Conditions with no significant change of variance. Two-sided F-test  $p$ -value  $> 0.05$ ; Levene test  $p$ -value  $> 0.1$ . **C.** Conditions with significant change of variance. Two-sided F-test \* $p$ -value  $< 0.05$ , \*\* $p$ -value  $< 0.005$ , \*\*\* $p$ -value  $< 0.0005$ ; Levene test † $p$ -value  $< 0.05$ ; N=288.

**Supplementary Table 1.**

| Strains   | Source         | Location     | Offspring viability | Estimated divergence to S288c (%) | Experiment                | Reference |
|-----------|----------------|--------------|---------------------|-----------------------------------|---------------------------|-----------|
| CECT10109 | Prickly pear   | Spain        | 97%                 | 0.31                              | Screen & Stress tolerance | [1]       |
| CLIB192   | Baker          | France       | 92%                 | 0.11                              | Screen                    | [1]       |
| CLIB219   | Wine           | Russia       | 92%                 | 0.44                              | Screen & Stress tolerance | [1]       |
| CLIB272   | Beer           | US           | 95%                 | 0.23                              | Screen & Stress tolerance | [1]       |
| CLIB294   | Fermentation   | France       | 94%                 | 0.25                              | Screen & Stress tolerance | [1]       |
| CLIB382   | Beer           | Japan        | 92%                 | 0.25                              | Screen & Stress tolerance | [1]       |
| DBVPG3591 | Cocoa beans    |              | 93%                 | 0.23                              | Screen & Stress tolerance | [1]       |
| DBVPG6861 | Polluted water |              | 96%                 |                                   | Screen                    | [1]       |
| EM93      | Rotting fig    | US           | 91%                 | 0.14                              | Screen                    | [1]       |
| I14       | Vineyard       | Italy        | 94%                 | 0.25                              | Screen & Stress tolerance | [1]       |
| K12       | Sake           | Japan        | 91%                 | 0.25                              | Screen                    | [1]       |
| PW5       | Palm wine      | Nigeria      | 91%                 | 0.59                              | Screen                    | [1]       |
| T7        | Oak tree       | US           | 100%                | 0.49                              | Screen & Stress tolerance | [1]       |
| UC8       | Wine           | South Africa | 99%                 | 0.28                              | Screen & Stress tolerance | [1]       |
| Y12       | Palm wine      | Africa       | 92%                 | 0.35                              | Screen & Stress tolerance | [1]       |
| Y3        | Palm wine      | Africa       | 91%                 | 0.38                              | Screen & Stress tolerance | [1]       |
| Y9        | Ragi           | Indonesia    | 92%                 | 0.34                              | Screen & Stress tolerance | [1]       |
| YJM269    | Apple juice    |              | 92%                 | 0.38                              | Screen & Stress tolerance | [1]       |
| YJM280    | Clinical       | US           | 92%                 | 0.35                              | Screen                    | [1]       |
| YJM320    | Clinical       | US           | 96%                 | 0.32                              | Screen & Stress tolerance | [1]       |
| YJM326    | Clinical       | US           | 91%                 | 0.32                              | Screen & Stress tolerance | [1]       |
| YJM421    | Clinical       | US           | 95%                 | 0.35                              | Screen & Stress tolerance | [1]       |
| YJM440    | Clinical       | US           | 90%                 |                                   | Screen & Stress tolerance | [1]       |
| YJM653    | Clinical       | US           | 94%                 | 0.32                              | Screen & Stress tolerance | [1]       |
| YJM678    | Clinical       |              | 95%                 |                                   | Screen & Stress tolerance | [1]       |
| YPS1000   | Oak exudate    | US           | 90%                 | 0.41                              | Screen & Stress tolerance | [1]       |

**Supplementary Table 1 - Information of natural isolates used in this study**

The offspring viability was estimated by dissection of 30 tetrads on YPD.

**Supplementary Table 2.**

| <b>Condition</b> | <b>Composition</b>                            | <b>Stress type</b>   | <b>Experiment</b>         |
|------------------|-----------------------------------------------|----------------------|---------------------------|
| YPD 30°C         | 1% yeast extract; 2% peptone; 2% glucose      | Rich media           | Screen & Stress tolerance |
| YPD 37°C         | 1% yeast extract; 2% peptone; 2% glucose      | Rich media           | Stress tolerance          |
| YPD 40°C         | 1% yeast extract; 2% peptone; 2% glucose      | Rich media           | Screen & Stress tolerance |
| YNB              | 0.67% yeast nitrogen base w/ ammonium sulfate | Minimum media        | Screen                    |
| YP gal 2%        | 1% yeast extract; 2% peptone; 2% galactose    | Carbon utilization   | Screen                    |
| YP fru 2%        | 1% yeast extract; 2% peptone; 2% fructose     | Carbon utilization   | Screen                    |
| YP man 2%        | 1% yeast extract; 2% peptone; 2% mannose      | Carbon utilization   | Screen                    |
| YP sorb 2%       | 1% yeast extract; 2% peptone; 2% sorbitol     | Carbon utilization   | Screen                    |
| YP gly 2%        | 1% yeast extract; 2% peptone; 2% glycerol     | Carbon utilization   | Screen & Stress tolerance |
| YP eth 2%        | 1% yeast extract; 2% peptone; 2% ethanol      | Carbon utilization   | Screen & Stress tolerance |
| YP glu 8%        | 1% yeast extract; 2% peptone; 8% glucose      | Carbon utilization   | Stress tolerance          |
| YP glu 0.01%     | 1% yeast extract; 2% peptone; 0.01% glucose   | Carbon utilization   | Stress tolerance          |
| NaCl 1 M         | YPD; NaCl 1 M                                 | Signal transduction  | Screen & Stress tolerance |
| NaCl 1.5 M       | YPD; NaCl 1.5 M                               | Signal transduction  | Screen                    |
| KCl 1M           | YPD; KCl 1 M                                  | Osmotic stress       | Stress tolerance          |
| SDS 0.03%        | YPD; SDS 0.03%                                | Membrane stability   | Screen                    |
| SDS 0.06%        | YPD; SDS 0.06%                                | Membrane stability   | Screen & Stress tolerance |
| CHX 0.1 µg/ml    | YPD; Cycloheximide 0.1 µg/ml                  | Translational stress | Screen & Stress tolerance |
| CHX 0.2 µg/ml    | YPD; Cycloheximide 0.2 µg/ml                  | Translational stress | Screen                    |
| YPD eth 5%       | YPD; ethanol 5%                               | Proteome stability   | Screen                    |
| YPD eth 10%      | YPD; ethanol 10%                              | Proteome stability   | Screen                    |
| YPD eth 15%      | YPD; ethanol 15%                              | Proteome stability   | Stress tolerance          |
| DMSO 2%          | YPD; DMSO 2%                                  | Oxidative stress     | Screen                    |
| DMSO 8%          | YPD; DMSO 8%                                  | Oxidative stress     | Screen                    |
| DTT 1.5 mM       | YPD; DTT 1.5 mM                               | Reductive stress     | Screen                    |
| DTT 2 mM         | YPD; DTT 2 mM                                 | Reductive stress     | Screen                    |

**Supplementary Table 2, related to Figure 1 and Figure 3 - List of media conditions used and their compositions**

**Supplementary Table 3.**

| <b>GO Biological Process (2062 categories)</b>                                    |                |                                                                                                                                                                                                                                                                             |          |          |
|-----------------------------------------------------------------------------------|----------------|-----------------------------------------------------------------------------------------------------------------------------------------------------------------------------------------------------------------------------------------------------------------------------|----------|----------|
| <b>Category</b>                                                                   | <b>p-value</b> | <b>In Category from Cluster</b>                                                                                                                                                                                                                                             | <b>k</b> | <b>f</b> |
| <b>transmembrane transport [GO:0055085]</b>                                       | 2.76E-09       | SEO1 VBA2 SUL1 PCA1 PHO89 GEX1 ERS1 GIT1 YDL199C VBA4 CCC2 NHX1 CAN1 HXT13 HVG1 FCY21 ALR2 AGP3 MAL11 DUR3 VMR1 YHK8 QDR1 DAL4 PAM16 TRK1 HXT8 HXT9 MCH2 GAP1 NFT1 GEX2 MMP1 NHA1 YLR152C AQR1 TIM23 BIO5 TAT2 HXT11 YOL162W YOL163W NRT1 THI72 COT1 SSU1 PXA1 YPR011C OPT2 | 49       | 303      |
| <b>cellular monovalent inorganic cation homeostasis [GO:0030004]</b>              | 0.00029        | NHX1 NHA1 VHS3                                                                                                                                                                                                                                                              | 3        | 3        |
| <b>amino acid transport [GO:0006865]</b>                                          | 0.0003189      | VBA2 VBA4 CAN1 AUA1 AGP3 AVT3 GAP1 MMP1 BIO5 TAT2                                                                                                                                                                                                                           | 10       | 42       |
| <b>maltose metabolic process [GO:0000023]</b>                                     | 0.000415       | MAL33 MAL32 MAL13 MAL11 MAL12                                                                                                                                                                                                                                               | 5        | 11       |
| <b>cellular cell wall organization [GO:0007047]</b>                               | 0.001996       | ECM8 ECM11 HLR1 ECM34 ECM12 ECM14 PGU1 ECM4 CTS1 ECM19 ECM30 WSC2 TIR4 SPR1                                                                                                                                                                                                 | 14       | 89       |
| <b>flocculation [GO:0000128]</b>                                                  | 0.002621       | FLO1 MUC1 FLO10                                                                                                                                                                                                                                                             | 3        | 5        |
| <b>nucleobase transport [GO:0015851]</b>                                          | 0.002908       | FCY21 DAL4 NRT1 THI72                                                                                                                                                                                                                                                       | 4        | 10       |
| <b>amino acid transmembrane transport [GO:0003333]</b>                            | 0.003968       | CAN1 AGP3 GAP1 MMP1 BIO5 TAT2                                                                                                                                                                                                                                               | 6        | 24       |
| <b>nucleobase, nucleoside, nucleotide and nucleic acid transport [GO:0015931]</b> | 0.004332       | FCY21 DAL4 NRT1 THI72                                                                                                                                                                                                                                                       | 4        | 11       |
| <b>maltose catabolic process [GO:0000025]</b>                                     | 0.004391       | MAL32 MAL12                                                                                                                                                                                                                                                                 | 2        | 2        |
| <b>glutathione transmembrane transport [GO:0034775]</b>                           | 0.004391       | GEX1 GEX2                                                                                                                                                                                                                                                                   | 2        | 2        |
| <b>copper ion export [GO:0060003]</b>                                             | 0.004391       | PCA1 CCC2                                                                                                                                                                                                                                                                   | 2        | 2        |
| <b>cinnamic acid catabolic process [GO:0046281]</b>                               | 0.004391       | PAD1 FDC1                                                                                                                                                                                                                                                                   | 2        | 2        |
| <b>triglyceride mobilization [GO:0006642]</b>                                     | 0.004391       | TGL4 TGL5                                                                                                                                                                                                                                                                   | 2        | 2        |
| <b>pseudohyphal growth [GO:0007124]</b>                                           | 0.00887        | CDC39 TMN2 STE12 FKH1 MUC1 PGU1 PHD1 SPH1 DFG16 HMS1                                                                                                                                                                                                                        | 10       | 64       |
| <b>MIPS Functional Classification (459 categories)</b>                            |                |                                                                                                                                                                                                                                                                             |          |          |
| <b>Category</b>                                                                   | <b>p-value</b> | <b>In Category from Cluster</b>                                                                                                                                                                                                                                             | <b>k</b> | <b>f</b> |
| <b>amino acid/amino acid derivatives transport [20.01.07]</b>                     | 0.0001246      | VBA2 ERS1 CAN1 AUA1 AGP3 AVT3 GAP1 MMP1 BIO5 TAT2 NRT1                                                                                                                                                                                                                      | 11       | 45       |
| <b>transcription repression [11.02.03.04.03]</b>                                  | 0.0003351      | CRF1 MIG3 RME1 HYM1 MOT3 WHI5 SFL1 ROX1                                                                                                                                                                                                                                     | 8        | 28       |
| <b>detoxification [32.07]</b>                                                     | 0.002122       | GEX1 GRX3 VBA4 PAD1 ALR2 ROG3 SLH1 YHK8 YJR015W NFT1 GEX2 AQR1 SSU1                                                                                                                                                                                                         | 13       | 80       |
| <b>transport facilities [20.03]</b>                                               | 0.004513       | SEO1 GEX1 MCH2 PTR2 GEX2 TIM23 BIO5 YOL162W YOL163W NRT1 THI72 YPR011C OPT2                                                                                                                                                                                                 | 13       | 87       |
| <b>cellular import [20.09.18]</b>                                                 | 0.006049       | APL3 SUL1 CAN1 HXT13 ALR2 DAL4 TRK1 HXT8 HXT9 FRE2 GAP1 TAT2 HXT11                                                                                                                                                                                                          | 13       | 90       |
| <b>secondary metabolism [01.20]</b>                                               | 0.006162       | COQ4 GRE3 AYT1 GCY1                                                                                                                                                                                                                                                         | 4        | 12       |
| <b>proton driven antiporter [20.03.02.03.01]</b>                                  | 0.008296       | VBA2 ERS1 ATO2                                                                                                                                                                                                                                                              |          |          |

**Supplementary Table 3, related to Figure 4 - GO term enrichment results of genes carrying TAA nonsense mutation in 100 diverse natural isolates with publically available genomes**

## Supplementary reference

1. Hou, J., Friedrich, A., de Montigny, J. & Schacherer, J. Chromosomal rearrangements as a major mechanism in the onset of reproductive isolation in *Saccharomyces cerevisiae*. *Curr Biol* **24**, 1153-9 (2014).
